# Supplementary material
Source: publisher figshare collection journal article supplement (https://frontiersin.figshare.com/ndownloader/files/35470460)
Supplement: Supplementary file 1 [file 35470460]

## Sheet: S3-Phage06 genome annotation
Phage TG-crAlp-06 genome annotation
					BLASTP			HHpred
	Start	Stop	Frame	Predicted function	E-value	Description	Accession#	HHPred Hit (PDB#)	Description	Probability (%)	Coverage (%)	Function evidence/notes
Gene_1	24	98045	-	PDC GE1 Domain	NA	NA	NA	4Q2S_A	PDC GE1 Domain	51.1	32	Hhpred hit to PDC GE1 Domain
Gene_2	328	155	-	Unknown	NA	NA	NA	NA	NA	NA	NA
Gene_3	706	335	-	Glycosyl hydrolase	NA	NA	NA	6D2W_A	Aryl-phospho-beta-D-glucosidase BglC	75.4	17.9	HHpred hit to C4-discarboxylate transport sensor protein
Gene_4	1059	703	-	C4-discarboxylate transport sensor protein	NA	NA	NA	3E4O_A	C4-discarboxylate transport sensor protein	82.1	86.4	HHpred hit to Aryl-phospho-beta-D-glucosidase BglC
Gene_5	1208	1056	-	Membrane protein	NA	NA	NA	NA	NA	NA	NA	TMHMM: 1 transmembrane domain predicted
Gene_6	1744	1205	-	dUTPase	NA	NA	NA	5F9K_A	Deoxyuridine 5'-triphosphate nucleotidohydrolase (dUTPase)	84	86	HHpred hit to dUTPase/Hit to Azobacteroides phage ProJPt-Bp1
Gene_7	2649	1750	-	Unknown	NA	NA	NA	NA	NA	NA	NA
Gene_8	3197	2745	-	DNA binding protein HU	NA	NA	NA	5EKA_A	DNA binding protein HU	97.1	54	HHpred hit to DNA-binding protein HU
Gene_9	4068	3172	-	Serine/threonine-protein kinase	NA	NA	NA	3OST_A	serine/threonine-protein kinase	70	33.9	HHpred hit to serine/threonine-protein kinase
Gene-10	4516	4070	-	Hydrolase	NA	NA	NA	5E62_D	Hemagglutinin-esterase; Hydrolase	72.9	10.1	HHpred hit to Hemagglutinin-esterase; influenza, complex, HEF, HYDROLASE related with Influenza D virus
Gene_11	4753	4586	-	Glycan binding protein/Membrane protein	NA	NA	NA	6D2Y_A	PbSGBP-B lipoprotein; surface glycan binding protein	79.3	94.5	HHpred hit to glycan binding protein from Prevotella bryantii B14; TMHMM: 2 transmembrane domains predicted
Gene_12	4982	4830	-	Recombination protein RecR	NA	NA	NA	5ZVQ_A	Recombination protein RecR	52.3	68	HHpred hit to recombination protein RecR; recombination mediator protein, RECOMBINATION
Gene_13	5091	4984	-	DNA-directed RNA polymerase	3e-09	adenosylcobalamin-dependent ribonucleoside-diphosphate reductase	MBE9469115.1	4QIW_W	DNA-directed RNA polymerase subunit P	96.9	63.2	HHpred hit DNA-directed RNA polymerase subunit P; Transcription, DNA-directed RNA polymerase, BLASTP hit to adenosylcobalamin-dependent ribonucleoside-diphosphate reductase
Gene_14	5510	5118	-	Unknown	NA	NA	NA	A	NA	NA	NA
Gene_15	5944	5525	-	Unknown	NA	NA	NA	NA	NA	NA	NA
Gene_16	6773	5949	-	Unknown	NA	NA	NA	7JRJ_C	Flagellar radial spoke protein 4	55.1	14.9
Gene_17	6891	6766	-	Membrane protein	NA	NA	NA	NA	NA	NA	NA	TMHMM: 1 transmembrane domain predicted
Gene_18	7477	6917	-	Dihydrofolate reductase	7.31e-09	dihydrofolate reductase	HBP25988	3TQ8_A	Dihydrofolate reductase, Oxidoreductase inhibitor	99.9	75.3	Both BLASTP and HHpred hit to dihydrofolate reductase
Gene_19	7880	7458	-	Unknown	NA	NA	NA	NA	NA	NA	NA
Gene_20	8878	7877	-	Exonuclease	5.52e-16	Exonuclease	QWM89329	3H4R_A	Exonuclease	99.9	91.6	Both BLASTP and HHpred hit to Exonuclease, BLASTP result from crAss-like virus sp.
Gene_21	9846	8887	-	Unknown	NA	NA	NA	NA	NA	NA	NA
Gene_22	10886	9852	-	DNA primase	1.83e-30	DNA primase	QWM89837	1Q67_B	DNA primase	99.7	69.6	BLASTP hit to DNA primase from crAss-like virus sp.; HHpred hit to DNA primase from Enterobacteria phage T7
Gene_23	11613	10852	-	AAA domain protein/Adenosylcobinamide kinase	3.62e-52	AAA domain protein	DAR45661	1C9K_A	Adenosylcobinamide kinase	98.7	66.4	BLASTP hit to AAA domain; HHpred hit to adenosylcobinamide kinase
Gene_24	12030	11638	-	Unknown	NA	NA	NA	5GNA_B	Flagellar hook-associated protein; GENE Regulation	90.7	24.6
Gene_25	13110	12106	-	DNAB-like replicative helicase	3.85e-75	DNA helicase	YP_010110297	3BH0_A	DNAB-like replicative, helicase, ATPase, replication	100	89.2	Both BLASTP and HHpred hit tp Helicase/ ATPase and replication with high rate. HHpred result match to Bacillus phage SPP1
Gene_26	13688	13467	-	Unknown	NA	NA	NA	6ZZZ_B	Translocation protein	63	13.7
Gene_27	13965	13693	-	Membrane protein	NA	NA	NA	NA	NA	NA	NA	TMHMM: 2 transmembrane domain predicted
Gene_28	14177	13974	-	Unknown	NA	NA	NA	6DMP_A	PAC2 family protein	75.8	64.2
Gene_29	14482	14177	-	Peroxiredoxin	8.74e-61	Hypothetical protein	BAG84097	3DRN_B	Thioredoxin-like protein Sco1 (YpmQ)	63.6	33.7	HHpred hit to peroxiredoxin
Gene_30	14586	14479	-	Unknown	NA	NA	NA	5J0J_A	designed protein 2L6HC3_6	86.4	97.1
Gene_31	14732	14607	-	Regulatory protein	NA	NA	NA	1WOM_B	Sigma factor sigB regulation protein rsbQ; alpha/beta hydrolase	68.5	58.53	HHpred hit to Sigma factor sigB regulation protein rsbQ; alpha/beta hydrolase, SIGNALLING PROTEIN
Gene_32	15018	14734	-	Unknown	NA	NA	NA	NA	NA	NA	NA
Gene_33	15619	15434	-	Hydrolase	NA	NA	NA	6NE9_B	Isoamylase protein, carbohydrate esterase family	76.2	36.01	HHpred hit to Isoamylase protein; carbohydrate esterase family 1, HYDROLASE
Gene_34	16379	15693	-	Unknown	1.19e-83	Hypothetical protein	BAG84096	4EBG_B	Uncharacterized/secreted protein	84	20.6	BLASTP hit to hypothetical protein from Candidatus Azobacteroides pseudotrichonymphae genomovar. CFP2
Gene_35	16639	16523	-	Unknown	NA	NA	NA	NA	NA	NA	NA
Gene_36	16880	17059	+	Membrane protein	NA	NA	NA	NA	NA	NA	NA	TMHMM: 1 transmembrane domain protein
Gene_37	17102	17203	+	Unknown	NA	NA	NA	NA	NA	NA	NA
Gene_38	17645	17250	-	Unknown	NA	NA	NA	NA	NA	NA	NA
Gene_39	17552	17250	-	Unknown	NA	NA	NA	NA	NA	NA	NA
Gene_40	17696	18058	+	Endodeoxyribonuclease	5.37e-14	Endonuclease	DAM45212	4ZCF_C	Restriction endonuclease EcoP15I	98.6	93.3	Both BLASTP and HHpred hit to Endonuclease
Gene_41	18245	18051	-	Unknown	NA	NA	NA	NA	NA	NA	NA
Gene_42	18477	20402	+	Fibritin	1.58e-13	Hypothetical protein	YP_010088140	2BSG_C	Fibritin, attachment protein	94.2	36.8	BLASTP hit to hypothetical protein from Azobacteroides phage ProJPt-Bp1; HHpred hit to fibritin from bacteriophage T7
Gene_43	20410	20754	+	Unknown	NA	NA	NA	NA	NA	NA	NA
Gene_44	20790	21134	+	Unknown	NA	NA	NA	NA	NA	NA	NA
Gene_45	21150	21542	+	Unknown	NA	NA	NA	NA	NA	NA	NA
Gene_46	21623	21730	+	Unknown	NA	NA	NA	NA	NA	NA	NA
Gene_47	21721	22113	+	Unknown	NA	NA	NA	NA	NA	NA	NA
Gene_48	22092	25880	+	Unknown	NA	NA	NA	NA	NA	NA	NA
Gene_49	25877	28558	+	Unknown	NA	NA	NA	7DCO_t	Pre-mRNA-processing factor 19; RNA splicing	66.1	9.9
Gene_50	28558	28848	+	Unknown	NA	NA	NA	NA	NA	NA	NA
Gene_51	28863	32705	+	Unknown	NA	NA	NA	NA	NA	NA	NA
Gene_52	32705	33418	+	Unknown	NA	NA	NA	NA	NA	NA	NA
Gene_53	33418	36204	+	ssDNA binding protein	2.43e-32	Hypothetical protein	YP_010088147	4PSM_C	ssDNA binding protein; ssDNA binding protein	66.5	16.3	BLASTP hit to hypothetical protein from Azobacteroides phage ProJPt-Bp1; HHpred hit to ssDNA binding protein
Gene_54	36234	36545	+	Unknown	NA	NA	NA	NA	NA	NA	NA
Gene_55	36542	38602	+	Large terminase	0	Terminase	QWM91450	3CPE_A	DNA packaging, large terminase	100	88	BLASTP hit to large terminase from crAss-like clade sp.; HHpred hit to large terminase from Bacteriophage T4
Gene_56	38599	39516	+	Unknown	8.79e-15	Hypothetical protein	YP_010088150	3TU5_B	Gelsolin	69.4	4.9	BLASTP hit to hypothetical protein from Azobacteroides phage ProJPt-Bp1
Gene_57	39513	40574	+	Unknown	1.17e-49	Hypothetical protein	YP_010088151	NA	NA	NA	NA	BLASTP hit to hypothetical protein from Azobacteroides phage ProJPt-Bp1
Gene_58	40609	41691	+	Unknown	2.07e-10	Hypothetical protein	YP_010110600	NA	NA	NA	NA	BLASTP hit to hypothetical protein from crAssphage
Gene_59	41770	42786	+	Unknown	1.47e-09	Hypothetical protein	YP_010110600	NA	NA	NA	NA	BLASTP hit to hypothetical protein from crAssphage
Gene_60	42808	44010	+	VIP2/Actin-ADP ribosylating toxin	2e-70	VIP2; Actin-ADP ribosylating toxin family protein	YP_010088154	7BQQ_A	Gogy; de novo designed protein	77.7	22	BLASTP hit to VIP2; Actin-ADP ribosylating toxin family protein from Azobacteroides phage ProJPt-Bp1
Gene_61	44032	45498	+	Major capsid protein	9.97e-167	Major capsid protein	QWM91442	5LII_P	Major capsid protein	99.3	43.6	BLASTP hit to Major capsid protein from crAss clade sp.; HHpred hit Major capsid protein from multiply phage related organisms.
Gene_62	45518	46309	+	RecA protein	2.21e-62	RecA protein	YP_010110240	1AA3_A	RecA, DNA binding protein	96.3	22.1	BLASTP hit to RecA protein from crAssphages; HHpred hit to RecA from Escherichia coli
Gene_63	46306	47169	+	Unknown	6.724e-42	Hypothetical protein	YP_010088157	NA	NA	NA	NA	BLASTP hit to hypothetical protein from Azobacteroides phage ProJPt-Bp1
Gene_64	47166	48065	+	Unknown	2.79e-38	Hypothetical protein	YP_010088158	NA	NA	NA	NA	BLASTP hit to hypothetical protein from Azobacteroides phage ProJPt-Bp1
Gene_65	48065	49108	+	Unknown	1.59e-54	Hypothetical protein	YP_010088159	NA	NA	NA	NA	BLASTP hit to hypothetical protein from Azobacteroides phage ProJPt-Bp1
Gene_66	49110	52109	+	Portal protein	0	Portal protein	YP_010113212	5JJ3_B	Portal protein	100	62.5	BLASTP hit to portal protein from crAssphage cr125_1; HHpred hit to portal protein from Enterobacteria phage P22
Gene_67	52109	57451	+	Membrane protein	NA	NA	NA	NA	NA	NA	NA	TMHMM: 2 transmembrane domains
Gene_68	57456	59036	+	Unknown	NA	NA	NA	NA	NA	NA	NA
Gene_69	59058	62870	+	Membrane protein	NA	NA	NA	NA	NA	NA	NA	TMHMM: 2 transmembrane domains
Gene_70	62874	67016	-	Unknown	2.48e-07	Epstein-Barr virus nuclear antigen3B domain protein	YP_010088164	7EGG_E	Transcrition initiation factor TFIID	59.2	3.2	BLASTP hit to protein from Azobacteroides phage ProJPt-Bp1
Gene_71	67029	67883	+	Unknown	3.37e-34	Hypothetical protein	YP_010088165	NA	NA	NA	NA	BLASTP hit to hypothetical protein from Azobacteroides phage ProJPt-Bp1
Gene_72	67894	71118	+	Membrane protein	7.55e-26	Hypothetical protein	YP_010088166	NA	NA	NA	NA	TMHMM: 3 transmembrane domains
Gene_73	71125	72885	+	Unknown	2.38e-49	Hypothetical protein	BAG84100	6XRX_A	maltodextrin-binding periplasmic protein	87.1	35.3	BLASTP hit to hypothetical protein from Azobacteroides pseudotrichonymphae genomovar. CFP2
Gene_74	72887	85393	+	DNA-dependent RNA polymerase	3.9e-125	putative structural protein	YP_010088169	6VR4_B	DNA-dependent RNA polymerase; Transferase; Transcription	100	45.4	HHpred hit to DNA-dependent RNA polymerase cellulophaga phage
Gene_75	85395	90698	+	Unknown	1.15e-06	Hypothetical protein	YP_010088170	PF15967.7	GCN1	82.7	12.2	BLASTP hit to hypothetical protein from Azobacteroides phage ProJPt-Bp1
Gene_76	90698	97879	+	Unknown	1.1e-26	Hypothetical protein	YP_010088172	NA	NA	NA	NA	BLASTP hit to phage stabilization protein from crAss clade sp.
Gene_77	98070	97975	-	Unknown	NA	NA	NA	4U3E_A	Ribonucleoside triphosphate reductase	69.84	3.1
